# Supplementary material for: Synthesis and structures of homo- and heterobimetallic rhodium(i) and/or iridium(i) complexes of binucleating bis(1-pyrazolyl)methane ligands
Source: Royal Society of Chemistry journal article supplement (doi:10.1039/c1dt10499c), 2011-01-01
Supplement: c1dt10499c.pdf [file c1dt10499c.pdf]

## **Supporting Information**

# **Synthesis and Structures of Homo- and Heterobimetallic Rhodium(I) and/or Iridium(I) Complexes of Binucleating *Bis(1-pyrazolyl)methane Ligands***

Joanne H. H. Ho, Jörg Wagler, Anthony C. Willis, and Barbara A. Messerle\*

## Part I. Experimental Data – $^1\text{H}$ and $^{13}\text{C}$ NMR data not included in the main document

Dirhodium(I) Dicyclooctadiene Complex with  $p\text{-C}_6\text{H}_4[\text{CH}(\text{pz})_2]_2$  Ligand ( $\text{L}_p$ , **1a**),  $[\text{Rh}_2(\text{COD})_2(\text{L}_p)][\text{BAr}^{\text{F}}_4]_2$  (**2**).

$^{13}\text{C}\{^1\text{H}\}$  NMR (150.9 MHz,  $\text{CD}_2\text{Cl}_2$ , 298 K):  $\delta$  162.11 (q,  $^1J(\text{B-C}) = 49.7$  Hz, 8C, quat C *ipso* to B of  $\text{BAr}^{\text{F}}_4$ ), 144.39 (s, C3 of Pz), 138.09 (s,  $\text{C}_a$ ), 135.16 (br s, 20C, *ortho*-CH of  $\text{BAr}^{\text{F}}_4$  and C5 of Pz), 129.22 (q,  $^2J(\text{F-C}) = 30.9$  Hz, 16C, C *ipso* to  $\text{CF}_3$  of  $\text{BAr}^{\text{F}}_4$ ), 127.46 (s,  $\text{C}_b$ ), 124.96 (q,  $^1J(\text{F-C}) = 272.7$  Hz, 16C,  $\text{CF}_3$  of  $\text{BAr}^{\text{F}}_4$ ), 117.87 (br s, 8C, *para*-CH of  $\text{BAr}^{\text{F}}_4$ ), 109.41 (s, C4 of Pz), 84.41 (d,  $^2J(\text{Rh-C}) = 12.3$  Hz, CH of COD), 75.61 (s,  $\text{CH}(\text{Pz})_2$ ), 30.45 (s,  $\text{CH}_2$  of COD), 30.15 (s,  $\text{CH}_2$  of COD) ppm.  $^{19}\text{F}\{^1\text{H}\}$  NMR (282.4 MHz,  $\text{CD}_2\text{Cl}_2$ , 298 K):  $\delta$  -63.19 ppm.

Iridium(I) Dicyclooctadiene Complex with  $p\text{-C}_6\text{H}_4[\text{CH}(\text{pz})_2]_2$  Ligand ( $\text{L}_p$ , **1a**),  $[\text{Ir}_2(\text{COD})_2(\text{L}_p)][\text{BAr}^{\text{F}}_4]_2$  (**3**).

$^{13}\text{C}\{^1\text{H}\}$  NMR (150.9 MHz,  $\text{CD}_2\text{Cl}_2$ , 298 K):  $\delta$  162.12 (q,  $^1J(\text{B-C}) = 49.9$  Hz, 8C, quat C *ipso* to B of  $\text{BAr}^{\text{F}}_4$ ), 144.50, 144.43 (2s, C3 of Pz), 137.68 (s,  $\text{C}_a$ ), 135.60, 135.53 (C5 of pz), 135.15 (br s, 16C, *ortho*-CH of  $\text{BAr}^{\text{F}}_4$ ), 129.16 (q,  $^2J(\text{F-C}) = 31.8$  Hz, 16C, C *ipso* to  $\text{CF}_3$  of  $\text{BAr}^{\text{F}}_4$ ), 126.66 (s,  $\text{C}_b$ ), 124.94 (q,  $^1J(\text{F-C}) = 272.0$  Hz, 16C,  $\text{CF}_3$  of  $\text{BAr}^{\text{F}}_4$ ), 117.93 (br s, 8C, *para*-CH of  $\text{BAr}^{\text{F}}_4$ ), 109.87, 109.81 (2s, C4 of Pz), 76.72 (s,  $\text{CH}(\text{Pz})_2$ ), 70.11, 68.85 (2s, CH of COD), 31.21 (s,  $\text{CH}_2$  of COD), 30.80 (s,  $\text{CH}_2$  of COD) ppm.  $^{19}\text{F}\{^1\text{H}\}$  NMR (282.4 MHz,  $\text{CD}_2\text{Cl}_2$ , 298 K):  $\delta$  -63.19 ppm.

Dirhodium(I) Dicyclooctadiene Complex with  $m\text{-C}_6\text{H}_4[\text{CH}(\text{pz})_2]_2$  Ligand ( $\text{L}_m$ , **1b**),  $[\text{Rh}_2(\text{COD})_2(\text{L}_m)][\text{BAr}^{\text{F}}_4]_2$  (**4**).

$^{13}\text{C}\{^1\text{H}\}$  NMR (150.9 MHz,  $\text{CD}_2\text{Cl}_2$ , 298 K):  $\delta$  162.09 (q,  $^1J(\text{B-C}) = 50.4$  Hz, 8C, quat C *ipso* to B of  $\text{BAr}^{\text{F}}_4$ ), 144.38 (s, C3 of Pz), 137.34 (s,  $\text{C}_a$  and  $\text{c}$ ), 135.15 (br s, 16C, *ortho*-CH of  $\text{BAr}^{\text{F}}_4$ ), 134.93 (s, C5 of Pz), 131.76 (s,  $\text{C}_e$ ), 129.20 (q,  $^2J(\text{F-C}) = 31.7$  Hz, 16C, C *ipso* to  $\text{CF}_3$  of  $\text{BAr}^{\text{F}}_4$ ), 128.61 (s,  $\text{C}_d$  and  $\text{f}$ ), 124.94 (q,  $^1J(\text{F-C}) = 272.8$  Hz, 16C,  $\text{CF}_3$  of  $\text{BAr}^{\text{F}}_4$ ), 122.84 (s,  $\text{C}_b$ ), 117.85 (br s, 8C, *para*-CH of  $\text{BAr}^{\text{F}}_4$ ), 109.40 (s, C4 of Pz), 84.37 (apparent t,  $^2J(\text{Rh-C}) = 14.4$  Hz), CH of COD), 75.57 (s,  $\text{CH}(\text{Pz})_2$ ), 30.43 (s,  $\text{CH}_2$  of COD), 30.11 (s,  $\text{CH}_2$  of COD) ppm.  $^{19}\text{F}\{^1\text{H}\}$  NMR (282.4 MHz,  $\text{CD}_2\text{Cl}_2$ , 298 K):  $\delta$  -63.17 ppm.

Iridium(I) Dicyclooctadiene Complex with  $m\text{-C}_6\text{H}_4[\text{CH}(\text{pz})_2]_2$  Ligand ( $\text{L}_m$ , **1b**),  $[\text{Ir}_2(\text{COD})_2(\text{L}_m)][\text{BAr}^{\text{F}}_4]_2$  (**5**).

$^1\text{H}$  NMR (600 MHz,  $\text{CD}_2\text{Cl}_2$ , 298 K):  $\delta$  7.99 (d,  $^3J(\text{H}_5\text{-H}_4) = 2.5$  Hz, 4H, H5), 7.76 (d,  $^3J(\text{H}_4\text{-H}_3/5) = 2.3$  Hz, 4H, H3), 7.72 (s, 16H, *ortho*-CH of  $\text{BAr}^{\text{F}}_4$ ), 7.69 (t,  $^3J(\text{H}_e\text{-H}_d \text{ and } \text{f}) = 8.0$  Hz, 1H,  $\text{H}_e$ ), 7.56 (s, 8H, *para*-CH of  $\text{BAr}^{\text{F}}_4$ ), 7.42 (s, 2H,  $\text{CH}(\text{Pz})_2$ ), 6.81 (d,  $^3J(\text{H}_d \text{ and } \text{f-H}_e) = 7.4$

Hz, 2H, H<sub>d and f</sub>), 6.66 (t,  $^3J(\text{H4-H3/H5}) = 2.5$  Hz, 4H, H4), 5.34 (s, 1H, H<sub>b</sub>), 4.14 (m, 4H, CH of COD), 3.43 (m, 4H, CH of COD), 2.34 (m, 4H, CH<sub>2</sub> of COD), 1.72 (m, 4H, CH<sub>2</sub> of COD), 1.65 (m, 4H, CH<sub>2</sub> of COD), 1.45 (m, 4H, CH<sub>2</sub> of COD) ppm.  $^{13}\text{C}\{^1\text{H}\}$  NMR (150.9 MHz, CD<sub>2</sub>Cl<sub>2</sub>, 298 K):  $\delta$  162.09 (q,  $^1J(\text{B-C}) = 49.9$  Hz, 8C, quat C *ipso* to B of BAr<sup>F</sup><sub>4</sub>), 144.57 (s, C3 of Pz), 136.81 (s, C<sub>a and c</sub>), 135.27 (s, C5 of Pz), 135.15 (br s, 16C, *ortho*-CH of BAr<sup>F</sup><sub>4</sub>), 131.59 (s, C<sub>e</sub>), 129.20 (q,  $^2J(\text{F-C}) = 31.7$  Hz, 16C, C *ipso* to CF<sub>3</sub> of BAr<sup>F</sup><sub>4</sub>), 127.92 (s, C<sub>d and f</sub>), 124.93 (q,  $^1J(\text{F-C}) = 272.4$  Hz, 16C, CF<sub>3</sub> of BAr<sup>F</sup><sub>4</sub>), 121.77 (s, C<sub>b</sub>), 117.85 (br s, 8C, *para*-CH of BAr<sup>F</sup><sub>4</sub>), 109.90 (s, C4 of Pz), 75.80 (s, CH(Pz)<sub>2</sub>), 70.15 (s, CH of COD), 69.20 (s, CH of COD), 31.20 (s, CH<sub>2</sub> of COD), 30.62 (s, CH<sub>2</sub> of COD) ppm.  $^{19}\text{F}\{^1\text{H}\}$  NMR (282.4 MHz, CD<sub>2</sub>Cl<sub>2</sub>, 298 K):  $\delta$  -63.21 ppm.

Dirhodium(I) Dicyclooctadiene Complex with 1,8-C<sub>6</sub>H<sub>4</sub>[CH(pz)<sub>2</sub>]<sub>2</sub> Ligand (L<sub>Ant</sub>, **1c**), [Rh<sub>2</sub>(COD)<sub>2</sub>(L<sub>Ant</sub>)] [BAr<sup>F</sup><sub>4</sub>]<sub>2</sub> (**6**).

$^{13}\text{C}\{^1\text{H}\}$  NMR (150.9 MHz, CD<sub>2</sub>Cl<sub>2</sub>, 258 K):  $\delta$  161.60 (q,  $^1J(\text{B-C}) = 50.0$  Hz, 8C, quat C *ipso* to B of BAr<sup>F</sup><sub>4</sub>), 143.23 (s, C3b of Pz), 142.89 (s, C3a of Pz), 135.51 (s, C7), 135.31 (s, C5b of Pz), 135.05 (s, C5), 134.57 (br s, 16C, *ortho*-CH of BAr<sup>F</sup><sub>4</sub>), 134.05 (s, quat. C of anthracene), 133.52 (s, C4), 132.61 (br s, C5a of Pz and C10), 132.12 (s, quat. C of anthracene), 132.05 (s, quat. C of anthracene), 131.12 (s, C2), 128.55 (q,  $^2J(\text{F-C}) = 31.1$  Hz, 16C, C *ipso* to CF<sub>3</sub> of BAr<sup>F</sup><sub>4</sub>), 128.13 (s, quat. C of anthracene), 127.26 (s, quat. C of anthracene), 126.00 (s, C3/6), 125.05 (s, C3/6), 124.35 (q,  $^1J(\text{F-C}) = 272.9$  Hz, 16C, CF<sub>3</sub> of BAr<sup>F</sup><sub>4</sub>), 122.03 (s, quat. C of anthracene), 118.11 (s, C9), 117.41 (br s, 8C, *para*-CH of BAr<sup>F</sup><sub>4</sub>), 108.70 (s, C4a of Pz), 108.14 (s, C4b of Pz), 87.43 (s, CH of COD(b)), 85.09 (s, CH of COD(b)), 83.60 (s, CH of COD(a)), 82.95 (s, CH of COD(a)), 79.24 (s, CH(Pz)<sub>2</sub> at C8), 75.60 (s, CH(Pz)<sub>2</sub> at C1), 30.51 (s, CH<sub>2</sub> of COD(b)), 30.44 (s, CH<sub>2</sub> of COD(b)), 29.63 (s, CH<sub>2</sub> of COD(a)), 29.51 (s, CH<sub>2</sub> of COD(a)) ppm.  $^{19}\text{F}\{^1\text{H}\}$  NMR (282.4 MHz, CD<sub>2</sub>Cl<sub>2</sub>, 298 K):  $\delta$  -60.16 ppm.

Iridium(I) Dicyclooctadiene Complex with 1,8-C<sub>6</sub>H<sub>4</sub>[CH(pz)<sub>2</sub>]<sub>2</sub> Ligand (L<sub>Ant</sub>, **1c**), [Ir<sub>2</sub>(COD)<sub>2</sub>(L<sub>Ant</sub>)] [BAr<sup>F</sup><sub>4</sub>]<sub>2</sub> (**7**).

$^1\text{H}$  NMR (600 MHz, CD<sub>2</sub>Cl<sub>2</sub>, 273 K):  $\delta$  8.92 (s, 1H, H10), 8.40 (d,  $^3J(\text{H5-H6}) = 8.5$  Hz, 1H, H5), 8.38 (d,  $^3J(\text{H4-H3}) = 8.5$  Hz, 1H, H4), 8.04 (d,  $^3J(\text{H7-H6}) = 6.5$  Hz, 1H, H7), 7.89 (d,  $^3J(\text{H3b-H4b}) = 2.0$  Hz, 2H, H3b of Pz), 7.80 (s, 1H, CH(Pz)<sub>2</sub> at C8), 7.73 (br s, 16H, *ortho*-CH of BAr<sup>F</sup><sub>4</sub>), 7.66 (m, 1H, H6), 7.61 (m, 1H, H3), 7.54 (s, 8H, *para*-CH of BAr<sup>F</sup><sub>4</sub>), 7.48 (s, 1H, CH(Pz)<sub>2</sub> at C1), 7.45 (d,  $^3J(\text{H3a-H4a}) = 2.0$  Hz, 2H, H3a of Pz), 7.37 (d,  $^3J(\text{H5a-H4a}) = 2.5$  Hz, 2H, H5a of Pz), 7.22 (s, 1H, H9), 7.09 (d,  $^3J(\text{H5b-H4b}) = 2.7$  Hz, 2H, H5b of Pz), 6.47 (t,  $^3J(\text{H4a-H3a and H5a}) = 2.6$  Hz, 2H, H4a), 6.43 (br s, 1H, H2), 6.40 (t,  $^3J(\text{H4b-H3b and H5b}) = 2.5$  Hz, 2H, H4b), 4.45 (m, 2H, CH of COD(b)), 4.23 (m, 2H, CH of COD(b)), 3.91 (m, 2H, CH of COD(a)), 3.14 (m, 2H, CH of COD(a)), 2.50 (m, 2H, CH<sub>2</sub> of COD(b)), 2.40 (m, 2H, CH<sub>2</sub> of COD(b)), 2.21 (m, 2H, CH<sub>2</sub> of COD(a)), 2.00 (m, 4H, CH<sub>2</sub> of COD(b)),

1.56 (m, 2H, CH<sub>2</sub> of COD(a)), 1.34 (m, 2H, CH<sub>2</sub> of COD(a)), 1.21 (m, 2H, CH<sub>2</sub> of COD(a)) ppm. <sup>13</sup>C{<sup>1</sup>H} NMR (150.9 MHz, CD<sub>2</sub>Cl<sub>2</sub>, 273 K): δ 161.71 (q, <sup>1</sup>J(B-C) = 49.7 Hz, 8C, quat C *ipso* to B of BAr<sup>F</sup><sub>4</sub>), 143.88 (s, C3b of Pz), 142.93 (s, C3a of Pz), 136.00 (s, C5b of Pz), 135.82 (s, C7), 135.47 (s, C5), 135.25 (s, quat. C of anthracene), 134.70 (br s, 16C, *ortho*-CH of BAr<sup>F</sup><sub>4</sub>), 134.17 (s, quat. C of anthracene), 133.41 (s, C4), 133.07 (br s, C5a of Pz and C10), 132.30 (s, quat. C of anthracene), 132.11 (s, quat. C of anthracene), 130.74 (s, C2), 128.69 (q, <sup>2</sup>J(F-C) = 31.7 Hz, 16C, C *ipso* to CF<sub>3</sub> of BAr<sup>F</sup><sub>4</sub>), 127.95 (s, quat. C of anthracene), 126.05 (s, C6), 125.12 (s, C3), 124.47 (q, <sup>1</sup>J(F-C) = 272.7 Hz, 16C, CF<sub>3</sub> of BAr<sup>F</sup><sub>4</sub>), 121.44 (s, quat. C of anthracene), 117.65 (s, C9), 117.51 (br s, 8C, *para*-CH of BAr<sup>F</sup><sub>4</sub>), 109.36 (s, C4a of Pz), 108.89 (s, C4b of Pz), 79.13 (s, CH(Pz)<sub>2</sub> at C8), 75.94 (s, CH(Pz)<sub>2</sub> at C1), 73.37 (s, CH of COD(b)), 70.00 (s, CH of COD(b)), 69.65 (s, CH of COD(a)), 68.10 (s, CH of COD(a)), 31.15 (s, CH<sub>2</sub> of COD(b)), 30.59 (s, CH<sub>2</sub> of COD(b)), 30.40 (s, CH<sub>2</sub> of COD(a)), 30.31 (s, CH<sub>2</sub> of COD(a)) ppm.

Dirhodium(I) Tetracarbonyl Complex with *p*-C<sub>6</sub>H<sub>4</sub>[CH(pz)<sub>2</sub>]<sub>2</sub> Ligand (L<sub>p</sub>, **1a**), [Rh<sub>2</sub>(CO)<sub>4</sub>(L<sub>p</sub>)] [BAr<sup>F</sup><sub>4</sub>]<sub>2</sub> (**8**).

<sup>13</sup>C{<sup>1</sup>H} NMR (150.9 MHz, CD<sub>2</sub>Cl<sub>2</sub>, 298 K): δ 181.56 (d, <sup>1</sup>J(Rh-CO) = 69.9 Hz, CO), 162.07 (q, <sup>1</sup>J(B-C) = 49.3 Hz, 8C, quat C *ipso* to B of BAr<sup>F</sup><sub>4</sub>), 148.55 (s, C3 of Pz), 136.76 (s, C<sub>a</sub>), 136.21 (s, C5 of Pz), 135.12 (br s, 16C, *ortho*-CH of BAr<sup>F</sup><sub>4</sub>), 129.23 (qq, <sup>2</sup>J(F-C) = 31.2 Hz, 16C, C *ipso* to CF<sub>3</sub> of BAr<sup>F</sup><sub>4</sub>), 127.16 (s, C<sub>b</sub>), 124.91 (q, <sup>1</sup>J(F-C) = 272.8 Hz, 16C, CF<sub>3</sub> of BAr<sup>F</sup><sub>4</sub>), 117.90 (br s, 8C, *para*-CH of BAr<sup>F</sup><sub>4</sub>), 110.12 (s, C4 of Pz), 75.59 (s, CH(Pz)<sub>2</sub>) ppm. <sup>19</sup>F{<sup>1</sup>H} NMR (282.4 MHz, CD<sub>2</sub>Cl<sub>2</sub>, 298 K): δ -63.16 ppm. IR (KBr disc) ν<sub>CO</sub> = 2113, 2061 (s) cm<sup>-1</sup>.

Iridium(I) Tetracarbonyl Complex with *p*-C<sub>6</sub>H<sub>4</sub>[CH(pz)<sub>2</sub>]<sub>2</sub> Ligand (L<sub>p</sub>, **1a**), [Ir<sub>2</sub>(CO)<sub>4</sub>(L<sub>p</sub>)] [BAr<sup>F</sup><sub>4</sub>]<sub>2</sub> (**9**).

<sup>1</sup>H NMR (600 MHz, CD<sub>2</sub>Cl<sub>2</sub>, 298 K): δ 8.17 (d, <sup>3</sup>J(H5-H4) = 2.8 Hz, 4H, H5), 8.06 (d, <sup>3</sup>J(H5-H4) = 2.4 Hz, 4H, H3), 7.70 (m, 18H, *ortho*-CH of BAr<sup>F</sup><sub>4</sub> and CH(Pz)<sub>2</sub>), 7.53 (m, 8H, *para*-CH of BAr<sup>F</sup><sub>4</sub>), 6.76 (t, <sup>3</sup>J(H4-H3/5) = 2.6 Hz, 4H, H4), 6.46 (s, 4H, H<sub>b</sub>) ppm. <sup>13</sup>C{<sup>1</sup>H} NMR (150.9 MHz, CD<sub>2</sub>Cl<sub>2</sub>, 298 K): δ 168.95 (s, CO), 162.07 (q, <sup>1</sup>J(B-C) = 49.8 Hz, 8C, quat C *ipso* to B of BAr<sup>F</sup><sub>4</sub>), 149.66, 149.46, 149.41, 149.20 (4s, C3 of Pz), 136.93 (s, C<sub>a</sub>), 136.74, 136.65, 136.55, 136.46 (4s, C5 of Pz), 135.13 (br s, 16C, *ortho*-CH of BAr<sup>F</sup><sub>4</sub>), 129.17 (qq, <sup>2</sup>J(F-C) = 31.6 Hz, <sup>3</sup>J(B-C) = 2.9 Hz, 16C, C *ipso* to CF<sub>3</sub> of BAr<sup>F</sup><sub>4</sub>), 126.96 (s, C<sub>b</sub>), 124.91 (q, <sup>1</sup>J(F-C) = 272.8 Hz, 16C, CF<sub>3</sub> of BAr<sup>F</sup><sub>4</sub>), 117.85 (br s, 8C, *para*-CH of BAr<sup>F</sup><sub>4</sub>), 110.70, 110.63 (2s, C4 of Pz), 75.87, 75.82 (2s, CH(Pz)<sub>2</sub>) ppm. <sup>19</sup>F{<sup>1</sup>H} NMR (282.4 MHz, CD<sub>2</sub>Cl<sub>2</sub>, 298 K): δ -63.15 ppm. IR (KBr disc) ν<sub>CO</sub> = 2104, 2047 (s) cm<sup>-1</sup>.

Dirhodium(I) Tetracarbonyl Complex with *m*-C<sub>6</sub>H<sub>4</sub>[CH(pz)<sub>2</sub>]<sub>2</sub> Ligand (L<sub>m</sub>, **1a**), [Rh<sub>2</sub>(CO)<sub>4</sub>(L<sub>m</sub>)] [BAr<sup>F</sup><sub>4</sub>]<sub>2</sub> (**10**).

$^{13}\text{C}\{^1\text{H}\}$  NMR (150.9 MHz,  $\text{CD}_2\text{Cl}_2$ , 298 K):  $\delta$  181.58 (d,  $^1J(\text{Rh-CO}) = 69.8$  Hz, CO), 162.11 (q,  $^1J(\text{B-C}) = 49.7$  Hz, 8C, quat C *ipso* to B of  $\text{BAr}^{\text{F}_4}$ ), 148.71 (s, C3 of Pz), 136.06 (s, C5 of Pz), 135.48 (s, C<sub>a</sub> and c), 135.19 (br s, 16C, *ortho*-CH of  $\text{BAr}^{\text{F}_4}$ ), 132.38 (s, C<sub>e</sub>), 129.23 (q,  $^2J(\text{F-C}) = 31.2$  Hz, 16C, C *ipso* to  $\text{CF}_3$  of  $\text{BAr}^{\text{F}_4}$ ), 128.81 (s, C<sub>d</sub> and f), 124.97 (q,  $^1J(\text{F-C}) = 272.8$  Hz, 16C,  $\text{CF}_3$  of  $\text{BAr}^{\text{F}_4}$ ), 121.49 (s, C<sub>b</sub>), 117.90 (br s, 8C, *para*-CH of  $\text{BAr}^{\text{F}_4}$ ), 110.17 (s, C4 of Pz), 75.54 (s,  $\text{CH}(\text{Pz})_2$ ) ppm.  $^{19}\text{F}\{^1\text{H}\}$  NMR (282.4 MHz,  $\text{CD}_2\text{Cl}_2$ , 298 K):  $\delta$  -63.17 ppm. IR (KBr disc)  $\nu_{\text{CO}} = 2115, 2055$  (s)  $\text{cm}^{-1}$ .

Diiridium(I) Tetracarbonyl Complex with *m*- $\text{C}_6\text{H}_4[\text{CH}(\text{pz})_2]_2$  Ligand ( $\text{L}_m$ , **1a**),  $[\text{Ir}_2(\text{CO})_4(\text{L}_m)][\text{BAr}^{\text{F}_4}]_2$  (**11**).

$^1\text{H}$  NMR (600 MHz,  $\text{CD}_2\text{Cl}_2$ , 298 K):  $\delta$  8.11 (m, 8H, H5 and H3), 7.73 (s, 16H, *ortho*-CH of  $\text{BAr}^{\text{F}_4}$ ), 7.68 (s, 2H,  $\text{CH}(\text{Pz})_2$ ), 7.57 (m, 9H, *para*-CH of  $\text{BAr}^{\text{F}_4}$  and H<sub>e</sub>), 6.81 (t,  $^3J(\text{H4-H3/5}) = 2.6$  Hz, 4H, H4), 6.74 (br s, 2H, H<sub>d</sub> and f), 5.57 (s, 1H, H<sub>b</sub>) ppm.  $^{13}\text{C}\{^1\text{H}\}$  NMR (150.9 MHz,  $\text{CD}_2\text{Cl}_2$ , 298 K):  $\delta$  169.00 (s, CO), 162.07 (q,  $^1J(\text{B-C}) = 50.0$  Hz, 8C, quat C *ipso* to B of  $\text{BAr}^{\text{F}_4}$ ), 149.62 (s, C3 of Pz), 136.50 (s, C5 of Pz), 135.13 (br s, 17C, *ortho*-CH of  $\text{BAr}^{\text{F}_4}$  and C<sub>a</sub> and c), 132.50 (s, C<sub>e</sub>), 129.16 (q,  $^2J(\text{F-C}) = 31.4$  Hz, 16C, C *ipso* to  $\text{CF}_3$  of  $\text{BAr}^{\text{F}_4}$ ), 127.62 (s, C<sub>d</sub> and f), 124.91 (q,  $^1J(\text{F-C}) = 272.7$  Hz, 16C,  $\text{CF}_3$  of  $\text{BAr}^{\text{F}_4}$ ), 118.43 (s, C<sub>b</sub>), 117.86 (br s, 8C, *para*-CH of  $\text{BAr}^{\text{F}_4}$ ), 110.75 (s, C4 of Pz), 75.80 (s,  $\text{CH}(\text{Pz})_2$ ) ppm.  $^{19}\text{F}\{^1\text{H}\}$  NMR (282.4 MHz,  $\text{CD}_2\text{Cl}_2$ , 298 K):  $\delta$  -63.16 ppm. IR (KBr disc)  $\nu_{\text{CO}} = 2101, 2037$  (s)  $\text{cm}^{-1}$ .

Dirhodium(I) Tetracarbonyl Complex with 1,8- $\text{C}_6\text{H}_4[\text{CH}(\text{pz})_2]_2$  Ligand ( $\text{L}_{\text{Ant}}$ , **1c**),  $[\text{Rh}_2(\text{CO})_4(\text{L}_{\text{Ant}})][\text{BAr}^{\text{F}_4}]_2$  (**12**).

$^{13}\text{C}\{^1\text{H}\}$  NMR (150.9 MHz,  $\text{CD}_2\text{Cl}_2$ , 258 K):  $\delta$  181.25 (d,  $^1J(\text{Rh-CO}) = 70.4$  Hz, CO), 161.62 (q,  $^1J(\text{B-C}) = 49.4$  Hz, 8C, quat C *ipso* to B of  $\text{BAr}^{\text{F}_4}$ ), 148.87, 148.69, 148.13, 147.09 (4s, C3a and C3b of Pz), 136.60 (s, C5a/b of Pz), 137.31 (s, C7), 135.90 (s, C5), 135.17 (s, quat. C of anthracene), 134.64 (br s, 17C, *ortho*-CH of  $\text{BAr}^{\text{F}_4}$  and quat. C of anthracene), 134.04 (s, C4), 133.78 (s, C5a and C5b of Pz), 133.17 (s, C10), 132.19 (s, quat. C of anthracene), 130.33 (s, C2), 128.61 (q,  $^2J(\text{F-C}) = 31.1$  Hz, 16C, C *ipso* to  $\text{CF}_3$  of  $\text{BAr}^{\text{F}_4}$ ), 128.28 (s, quat. C of anthracene), 128.02 (s, quat. C of anthracene), 126.20 (s, C6), 125.03 (s, C3), 124.41 (q,  $^1J(\text{F-C}) = 272.7$  Hz, 16C,  $\text{CF}_3$  of  $\text{BAr}^{\text{F}_4}$ ), 120.23 (s, quat. C of anthracene), 117.47 (br s, 8C, *para*-CH of  $\text{BAr}^{\text{F}_4}$ ), 116.91 (s, C9), 109.41, 109.28, 108.98 (m, C4a and C4b of Pz), 108.14 (s, C4b of Pz), 79.44 (s,  $\text{CH}(\text{Pz})_2$  at C8), 75.21 (s,  $\text{CH}(\text{Pz})_2$  at C1) ppm.  $^{19}\text{F}\{^1\text{H}\}$  NMR (282.4 MHz,  $\text{CD}_2\text{Cl}_2$ , 298 K):  $\delta$  -63.17 ppm. IR (KBr disc)  $\nu_{\text{CO}} = 2112, 2057$  (s)  $\text{cm}^{-1}$ .

Diiridium(I) Tetracarbonyl Complex with 1,8- $\text{C}_6\text{H}_4[\text{CH}(\text{pz})_2]_2$  Ligand ( $\text{L}_{\text{Ant}}$ , **1c**),  $[\text{Ir}_2(\text{CO})_4(\text{L}_{\text{Ant}})][\text{BAr}^{\text{F}_4}]_2$  (**13**).

$^1\text{H}$  NMR (600 MHz,  $\text{CD}_2\text{Cl}_2$ , 243 K):  $\delta$  8.82 (s, 1H, H10), 8.68 (s, 1H, H9), 8.55 (s, 2H,  $\text{CH}(\text{Pz})_2$ ), 8.46 (d,  $^3J(\text{H}_{4,5}-\text{H}_{3,6}) = 8.6$  Hz, 2H, H4,5), 8.12 (d,  $^3J(\text{H}_{2,7}-\text{H}_{3,6}) = 6.8$  Hz, 2H, H2,7), 8.09 (d, 4H,  $^3J(\text{H}_{3'}-\text{H}_{4'}) = 1.90$  Hz, H3'), 7.90 (m, 2H, H3,6), 7.70 (s, 16H, *ortho*-CH of  $\text{BAr}^{\text{F}_4}$ ), 7.68 (d,  $^3J(\text{H}_{5'}-\text{H}_{4'}) = 2.76$  Hz, 4H, H5'), 7.49 (s, 8H, *para*-CH of  $\text{BAr}^{\text{F}_4}$ ), 6.49 (t,  $^3J(\text{H}_{4'}-\text{H}_{5'}$  and H3') = 2.43 Hz, 4H, H4').  $^{13}\text{C}\{^1\text{H}\}$  NMR (150.9 MHz,  $\text{CD}_2\text{Cl}_2$ , 243 K):  $\delta$  169.58 (s, CO), 161.43 (q,  $^1J(\text{B}-\text{C}) = 49.8$  Hz, 8C, quat C *ipso* to B of  $\text{BAr}^{\text{F}_4}$ ), 148.83 (s, C3' of Pz), 135.11 (s, C4,5), 134.91 (s, C5' of pz), 134.35 (br s, 16C, *ortho*-CH of  $\text{BAr}^{\text{F}_4}$ ), 133.86 (C12,13), 133.25 (C2,7), 132.01 (C10), 128.30 (q,  $^2J(\text{F}-\text{C}) = 31.50$  Hz, 16C, C *ipso* to  $\text{CF}_3$  of  $\text{BAr}^{\text{F}_4}$ ), 125.02 (C3,6), 127.92 (C11,14), 124.12 (q,  $^1J(\text{F}-\text{C}) = 272.3$  Hz, 16C,  $\text{CF}_3$  of  $\text{BAr}^{\text{F}_4}$ ), 119.91 (C1,8), 117.25 (br s, 8C, *para*-CH of  $\text{BAr}^{\text{F}_4}$ ), 112.82 (C9), 109.14 (s, C4' of Pz), 71.50 (s,  $\text{CH}(\text{Pz})_2$ ) ppm.  $^{19}\text{F}\{^1\text{H}\}$  NMR (282.4 MHz,  $\text{CD}_2\text{Cl}_2$ , 298 K):  $\delta$  -63.21 ppm. IR (KBr disc)  $\nu_{\text{CO}} = 2101, 2041$  (s)  $\text{cm}^{-1}$ .

Rhodium(I) Cyclooctadiene Complex,  $[\text{Rh}(\text{COD})(\text{L}_m)]\text{BAr}^{\text{F}_4}$  (**14**).

$^{13}\text{C}\{^1\text{H}\}$  NMR (150.9 MHz,  $d_8$ -THF, 298 K):  $\delta$  162.23 (q,  $^1J(\text{B}-\text{C}) = 49.4$  Hz, 4C, quat C *ipso* to B of  $\text{BAr}^{\text{F}_4}$ ), 143.80 (s, C3 of Pz), 140.54 (s, C3' of Pz), 140.09 (s, C<sub>c</sub>), 137.29 (s, C<sub>a</sub>), 135.83 (s, C5 of Pz), 135.00 (br s, 8C, *ortho*-CH of  $\text{BAr}^{\text{F}_4}$ ), 130.22 (s, C5' of Pz), 129.84-129.00 (m, 10C, C<sub>e</sub> and C<sub>d</sub> and C *ipso* to  $\text{CF}_3$  of  $\text{BAr}^{\text{F}_4}$ ), 126.34 (s, C<sub>f</sub>), 124.92 (q,  $^1J(\text{F}-\text{C}) = 271.4$  Hz, 8C,  $\text{CF}_3$  of  $\text{BAr}^{\text{F}_4}$ ), 124.51 (s, C<sub>b</sub>), 117.60 (br s, 4C, *para*-CH of  $\text{BAr}^{\text{F}_4}$ ), 108.07 (s, C4 of Pz), 106.58 (s, C4' of Pz), 84.61 (br s, CH of COD), 82.61 (br s, CH of COD), 76.90 (s,  $\text{CH}(\text{Pz})_2$  at C<sub>c</sub>), 75.63 (s,  $\text{CH}(\text{Pz})_2$  at C<sub>a</sub>), 30.25 (s,  $\text{CH}_2$  of COD), 29.91 (s,  $\text{CH}_2$  of COD) ppm.  $^{19}\text{F}\{^1\text{H}\}$  NMR (282.4 MHz,  $\text{CD}_2\text{Cl}_2$ , 298 K):  $\delta$  -62.10 ppm.

Iridium(I) Cyclooctadiene Complex,  $[\text{Ir}(\text{COD})(\text{L}_m)]\text{BAr}^{\text{F}_4}$  (**15**).

$^{13}\text{C}\{^1\text{H}\}$  NMR (150.9 MHz,  $\text{CD}_2\text{Cl}_2$ , 298 K):  $\delta$  162.08 (q,  $^1J(\text{B}-\text{C}) = 50.0$  Hz, 4C, quat C *ipso* to B of  $\text{BAr}^{\text{F}_4}$ ), 143.79 (s, C3 of Pz), 141.20 (s, C3' of Pz), 140.09 (s, C<sub>c</sub>), 139.43 (s, C<sub>a</sub>), 135.26 (s, C5 of Pz), 135.13 (br s, 8C, *ortho*-CH of  $\text{BAr}^{\text{F}_4}$ ), 130.19 (s, C5' of pz), 130.07 (s, C<sub>e</sub>), 129.72 (s, C<sub>d</sub>), 129.18 (qq,  $^2J(\text{F}-\text{C}) = 31.9$  Hz,  $^3J(\text{B}-\text{C}) = 2.8$  Hz, 8C, C *ipso* to  $\text{CF}_3$  of  $\text{BAr}^{\text{F}_4}$ ), 125.95 (s, C<sub>f</sub>), 124.93 (q,  $^1J(\text{F}-\text{C}) = 271.5$  Hz, 8C,  $\text{CF}_3$  of  $\text{BAr}^{\text{F}_4}$ ), 123.79 (s, C<sub>b</sub>), 117.83 (br s, 4C, *para*-CH of  $\text{BAr}^{\text{F}_4}$ ), 109.21 (s, C4 of Pz), 107.31 (s, C4' of Pz), 77.09 (s,  $\text{CH}(\text{Pz})_2$  at C<sub>c</sub>), 76.42 (s,  $\text{CH}(\text{Pz})_2$  at C<sub>a</sub>), 70.63 (s, CH of COD), 68.10 (s, CH of COD), 30.85 (s,  $\text{CH}_2$  of COD), 30.81 (s,  $\text{CH}_2$  of COD) ppm.  $^{19}\text{F}\{^1\text{H}\}$  NMR (282.4 MHz,  $\text{CD}_2\text{Cl}_2$ , 298 K):  $\delta$  -63.24 ppm.

Rhodium(I) Dicarboxyl Complex,  $[\text{Rh}(\text{CO})_2(\text{L}_m)]\text{BAr}^{\text{F}_4}$  (**16**).

$^{13}\text{C}\{^1\text{H}\}$  NMR (150.9 MHz,  $d_8$ -THF, 298 K):  $\delta$  183.16 (d,  $^1J(\text{Rh}-\text{CO}) = 70.0$  Hz, CO), 162.82 (q,  $^1J(\text{B}-\text{C}) = 49.7$  Hz, 4C, quat C *ipso* to B of  $\text{BAr}^{\text{F}_4}$ ), 148.76 (s, C3 of Pz), 141.14 (s, C3' of Pz), 140.62 (s, C<sub>c</sub>), 137.37 (s, C5 of Pz), 136.27 (s, C<sub>a</sub>), 135.60 (br s, 8C, *ortho*-CH of  $\text{BAr}^{\text{F}_4}$ ),

130.81 (s, C5' of pz), 130.62-129.62 (m, 10C, C<sub>e</sub> and C<sub>d</sub> and C *ipso* to CF<sub>3</sub> of BAr<sup>F</sup><sub>4</sub>), 126.60 (s, C<sub>f</sub>), 125.52 (q, <sup>1</sup>J(F-C) = 271.6 Hz, 8C, CF<sub>3</sub> of BAr<sup>F</sup><sub>4</sub>), 124.90 (s, C<sub>b</sub>), 118.19 (br s, 4C, *para*-CH of BAr<sup>F</sup><sub>4</sub>), 109.41 (s, C4 of Pz), 107.11 (s, C4' of Pz), 77.31 (s, CH(Pz)<sub>2</sub> at C<sub>c</sub>), 76.22 (s, CH(Pz)<sub>2</sub> at C<sub>a</sub>) ppm. <sup>19</sup>F{<sup>1</sup>H} NMR (282.4 MHz, CD<sub>2</sub>Cl<sub>2</sub>, 298 K): δ -63.13 ppm. IR (KBr disc) ν<sub>CO</sub> = 2107, 2049 (s) cm<sup>-1</sup>.

Iridium(I) Dicarbonyl Complex, [Ir(CO)<sub>2</sub>(L<sub>m</sub>)]BAr<sup>F</sup><sub>4</sub> (**17**).

<sup>13</sup>C{<sup>1</sup>H} NMR (150.9 MHz, CD<sub>2</sub>Cl<sub>2</sub>, 298 K): δ 169.38 (s, CO), 162.12 (q, <sup>1</sup>J(B-C) = 49.4 Hz, 4C, quat C *ipso* to B of BAr<sup>F</sup><sub>4</sub>), 148.92 (s, C3 of Pz), 141.41 (s, C3' of Pz), 139.68 (s, C<sub>c</sub>), 136.33 (s, C5 of Pz), 135.69 (s, C<sub>a</sub>), 135.18 (br s, 8C, *ortho*-CH of BAr<sup>F</sup><sub>4</sub>), 130.80 (br s, C<sub>d</sub> and C<sub>e</sub>), 130.41 (s, C5' of Pz), 129.26 (q, <sup>2</sup>J(F-C) = 32.5 Hz, 8C, C *ipso* to CF<sub>3</sub> of BAr<sup>F</sup><sub>4</sub>), 126.36 (s, C<sub>f</sub>), 124.96 (q, <sup>1</sup>J(F-C) = 271.5 Hz, 8C, CF<sub>3</sub> of BAr<sup>F</sup><sub>4</sub>), 124.07 (s, C<sub>b</sub>), 117.87 (br s, 4C, *para*-CH of BAr<sup>F</sup><sub>4</sub>), 110.14 (s, C4 of Pz), 107.40 (s, C4' of Pz), 76.89 (s, CH(Pz)<sub>2</sub> at C<sub>c</sub>), 76.66 (s, CH(Pz)<sub>2</sub> at C<sub>a</sub>) ppm. <sup>19</sup>F{<sup>1</sup>H} NMR (282.4 MHz, CD<sub>2</sub>Cl<sub>2</sub>, 298 K): δ -63.28 ppm. IR (KBr disc) ν<sub>CO</sub> = 2095, 2033 (s) cm<sup>-1</sup>.

Rhodium-Iridium Dicyclooctadiene Complex, [Rh(COD)Ir(COD)(L<sub>m</sub>)] [BAr<sup>F</sup><sub>4</sub>]<sub>2</sub> (**18**).

A CH<sub>2</sub>Cl<sub>2</sub> solution of [Rh(COD)<sub>2</sub>]BAr<sup>F</sup><sub>4</sub> (0.0578 g, 0.0489 mmol) was added dropwise to a CH<sub>2</sub>Cl<sub>2</sub> solution of complex **15** (0.0763 g, 0.0499 mmol). The reaction mixture was stirred for 0.5 h at RT. *n*-Pentane was added slowly to afford a yellow solid which was collected by filtration and washed with *n*-pentane (3 x 5 mL). The crude product was recrystallized from CH<sub>2</sub>Cl<sub>2</sub>/*n*-pentane to form a mixture of products **18**, **4** and **5** as a yellow solid. Yield: 0.117 g (0.0449 mmol), 92 %. ESI-MS (CH<sub>2</sub>Cl<sub>2</sub>), *m/z* (%): 1655.0 ([M - BAr<sup>F</sup><sub>4</sub>]<sup>+</sup> of 3.4, 33), 1745.0 ([M - BAr<sup>F</sup><sub>4</sub>]<sup>+</sup> of 3.20, 36), 1833.1 ([M - BAr<sup>F</sup><sub>4</sub>]<sup>+</sup> of 3.5, 26). <sup>1</sup>H NMR (600 MHz, CD<sub>2</sub>Cl<sub>2</sub>, 298 K): δ 8.00 (m, 4H, H5), 7.92 (m, 4H, H5'), 7.86 (t, <sup>3</sup>J(H<sub>e</sub>-H<sub>d</sub> and <sub>f</sub>) = 8.03 Hz, 1H, H<sub>e</sub> of [Rh<sub>2</sub>]), 7.78 (t, <sup>3</sup>J(H<sub>e</sub>-H<sub>d</sub> and <sub>f</sub>) = 8.03 Hz, 1H, H<sub>e</sub> of [RhIr]), 7.77 (m, 4H, H3), 7.72 (m, 17H, *ortho*-CH of BAr<sup>F</sup><sub>4</sub>, H<sub>e</sub> of [Ir<sub>2</sub>]), 7.55 (m, 12H, *para*-CH of BAr<sup>F</sup><sub>4</sub> and H3'), 7.47, 7.41 (2s, 2H, CH of [RhIr]), 7.46 (s, 2H, CH of [Ir<sub>2</sub>]), 7.42 (s, 2H, CH of [Rh<sub>2</sub>]), 6.96 (d, <sup>3</sup>J(H<sub>d</sub> and <sub>f</sub>-H<sub>e</sub>) = 7.63 Hz, 2H, H<sub>d</sub> and <sub>f</sub> of [Rh<sub>2</sub>]), 6.91, 6.87 (2d, <sup>3</sup>J(H<sub>d</sub> and <sub>f</sub>-H<sub>e</sub>) = 7.39 Hz, 2H, H<sub>d</sub> and <sub>f</sub> of [RhIr]), 6.82 (d, <sup>3</sup>J(H<sub>d</sub> and <sub>f</sub>-H<sub>e</sub>) = 6.87 Hz, 2H, H<sub>d</sub> and <sub>f</sub> of [Ir<sub>2</sub>]), 6.67 (t, <sup>3</sup>J(H4-H3/H5) = 2.45 Hz, 4H, H4), 6.57 (t, <sup>3</sup>J(H4-H3/H5) = 2.34 Hz, 4H, H4'), 5.46 (s, 1H, H<sub>b</sub> of [Rh<sub>2</sub>]), 5.40 (s, 1H, H<sub>b</sub> of [RhIr]), 5.35 (br s, 1H, H<sub>b</sub> of [Ir<sub>2</sub>]), 4.35 (m, 4H, CH of [Rh]COD), 4.15 (m, 4H, CH of [Ir]COD), 3.70 (m, 4H, CH of [Rh]COD), 3.44 (m, 4H, CH of [Ir]COD), 2.54 (m, 4H, CH<sub>2</sub> of [Rh]COD), 2.35 (m, 4H, CH<sub>2</sub> of [Ir]COD), 1.91 (m, 4H, CH<sub>2</sub> of [Rh]COD), 1.79 (m, 4H, CH<sub>2</sub> of [Rh]COD), 1.73 (m, 4H, CH<sub>2</sub> of [Ir]COD), 1.66 (m, 4H, CH<sub>2</sub> of [Rh]COD), 1.60 (m, 4H, CH<sub>2</sub> of [Ir]COD), 1.47 (m, 4H, CH<sub>2</sub> of [Ir]COD) ppm.

## Part II. Crystal Structure of 1,8-C<sub>14</sub>H<sub>8</sub>[CH(pz)<sub>2</sub>]<sub>2</sub> (**L<sub>Ant</sub>**, **1c**)

The molecular structure of [1,8-*bis*(*bis*(1-pyrazolyl)methyl)anthracene], **L<sub>Ant</sub>** (**1c**) was determined using single crystal X-ray diffraction. Crystals of **L<sub>Ant</sub>** (**1c**) suitable for X-ray diffraction were obtained by slow evaporation of a mixture of dichloromethane and toluene solution. The ORTEP diagram of **1c** together with the atom numbering scheme is shown in Figure 1.

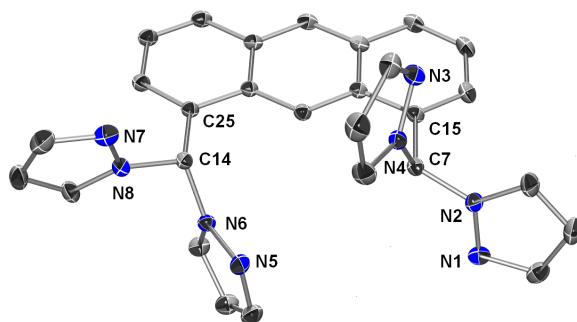

**Figure 1:** ORTEP depiction of 1,8-C<sub>14</sub>H<sub>8</sub>[CH(pz)<sub>2</sub>]<sub>2</sub> (**1c**) with 50% probability ellipsoids for the non-hydrogen atoms.

## Part III. Crystallographic Data

Crystallographic data for the solid state structures of ligand 1,8-C<sub>14</sub>H<sub>8</sub>[CH(pz)<sub>2</sub>]<sub>2</sub>, (**1c**), and complexes [Ir<sub>2</sub>(COD)<sub>2</sub>(L<sub>m</sub>)] [BAr<sup>F</sup><sub>4</sub>]<sub>2</sub> (**5**), [Rh<sub>2</sub>(CO)<sub>4</sub>(L<sub>m</sub>)] [BAr<sup>F</sup><sub>4</sub>]<sub>2</sub> (**10**), [Ir<sub>2</sub>(CO)<sub>4</sub>(L<sub>m</sub>)] [BAr<sup>F</sup><sub>4</sub>]<sub>2</sub> (**11**), [Rh<sub>2</sub>(COD)<sub>2</sub>(L<sub>p</sub>)] [BAr<sup>F</sup><sub>4</sub>]<sub>2</sub> (**2**), [Ir<sub>2</sub>(COD)<sub>2</sub>(L<sub>p</sub>)] [BAr<sup>F</sup><sub>4</sub>]<sub>2</sub> (**3**), [Ir<sub>2</sub>(CO)<sub>4</sub>(L<sub>p</sub>)] [BAr<sup>F</sup><sub>4</sub>]<sub>2</sub> (**9**), [Rh<sub>2</sub>(COD)<sub>2</sub>(L<sub>Ant</sub>)] [BAr<sup>F</sup><sub>4</sub>]<sub>2</sub> (**6**) and [Ir(COD)(L<sub>m</sub>)]BAr<sup>F</sup><sub>4</sub> (**5**) are presented in Tables 1-7 as shown below.



**Table 1:** Crystallographic data for the solid state structure of 1,8-C<sub>14</sub>H<sub>8</sub>[CH(pz)<sub>2</sub>]<sub>2</sub> (**1c**).

CCDC-798119

|                                                                             | <b>Anthracene-dibpm<br/>(1c)</b>                              |
|-----------------------------------------------------------------------------|---------------------------------------------------------------|
| Empirical formula                                                           | C <sub>28</sub> H <sub>22</sub> N <sub>8</sub>                |
| <i>M</i> (g mol <sup>-1</sup> )                                             | 470.54                                                        |
| Crystal system                                                              | monoclinic                                                    |
| Space group                                                                 | <i>P</i> 2 <sub>1</sub> / <i>c</i>                            |
| <i>a</i> (Å)                                                                | 10.0732(3)                                                    |
| <i>b</i> (Å)                                                                | 23.3283(5)                                                    |
| <i>c</i> (Å)                                                                | 10.6167(3)                                                    |
| <i>β</i> (°)                                                                | 112.066(1)                                                    |
| <i>V</i> (Å <sup>3</sup> )                                                  | 2312.08(11)                                                   |
| <i>D<sub>c</sub></i> (g.cm <sup>-3</sup> )                                  | 1.352                                                         |
| <i>Z</i>                                                                    | 4                                                             |
| <i>T</i> (K)                                                                | 90(2)                                                         |
| <i>λ</i> Mo-K <sub>α</sub> (Å)                                              | 0.71073                                                       |
| <i>μ</i> Mo-K <sub>α</sub> (mm <sup>-1</sup> )                              | 0.085                                                         |
| Crystal size (mm)                                                           | 0.55 x 0.45 x 0.10                                            |
| <i>T</i> (Gaussian) <sub>min,max</sub>                                      | 0.9245, 0.9915                                                |
| 2 <i>θ</i> <sub>max</sub> (°)                                               | 32.00                                                         |
| <i>hkl</i> range                                                            | -15 ≤ <i>h</i> ≤ 15, -34 ≤ <i>k</i> ≤ 34, -15 ≤ <i>l</i> ≤ 14 |
| <i>N</i>                                                                    | 31238                                                         |
| <i>N</i> <sub>ind</sub>                                                     | 8008 ( <i>R</i> <sub>merge</sub> 0.0281)                      |
| <i>N</i> <sub>obs</sub> ( <i>I</i> > 2σ( <i>I</i> ))                        | 5913                                                          |
| GoF(all data)                                                               | 1.096                                                         |
| <i>R</i> <sub>1</sub> , <i>wR</i> <sub>2</sub> [ <i>I</i> > 2σ( <i>I</i> )] | 0.0459, 0.1203                                                |
| <i>R</i> <sub>1</sub> , <i>wR</i> <sub>2</sub> (all data)                   | 0.0701, 0.1297                                                |

**Table 2:** Crystallographic data for the solid state structure of  $[\text{Ir}_2(\text{COD})_2(\text{L}_m)][\text{BAr}^{\text{F}}_4]_2 \cdot 2\text{CH}_2\text{Cl}_2$  (**5**).

CCDC-798127

|                                                  | $[\text{Ir}_2(\text{COD})_2(\text{L}_m)][\text{BAr}^{\text{F}}_4]_2 \cdot 2\text{CH}_2\text{Cl}_2$<br>( <b>5</b> ) $\cdot 2\text{CH}_2\text{Cl}_2$ |
|--------------------------------------------------|----------------------------------------------------------------------------------------------------------------------------------------------------|
| Empirical formula                                | $\text{C}_{101}\text{H}_{68}\text{B}_2\text{Cl}_2\text{F}_{48}\text{Ir}_2\text{N}_8$                                                               |
| $M$ ( $\text{g mol}^{-1}$ )                      | 2782.55                                                                                                                                            |
| Crystal system                                   | triclinic                                                                                                                                          |
| Space group                                      | $P-1$                                                                                                                                              |
| $a$ (Å)                                          | 12.5673(1)                                                                                                                                         |
| $b$ (Å)                                          | 17.6438(2)                                                                                                                                         |
| $c$ (Å)                                          | 24.3971(2)                                                                                                                                         |
| $\alpha$ (°)                                     | 86.700(1)                                                                                                                                          |
| $\beta$ (°)                                      | 89.240(1)                                                                                                                                          |
| $\gamma$ (°)                                     | 77.418(1)                                                                                                                                          |
| $V$ (Å <sup>3</sup> )                            | 5271.02(9)                                                                                                                                         |
| $D_c$ ( $\text{g.cm}^{-3}$ )                     | 1.753                                                                                                                                              |
| $Z$                                              | 2                                                                                                                                                  |
| $T$ (K)                                          | 200(2)                                                                                                                                             |
| $\lambda$ Mo- $\text{K}_\alpha$ (Å)              | 0.71073                                                                                                                                            |
| $\mu$ Mo- $\text{K}_\alpha$ ( $\text{mm}^{-1}$ ) | 2.709                                                                                                                                              |
| Crystal size (mm)                                | 0.55 x 0.23 x 0.05                                                                                                                                 |
| $T$ (Gaussian) <sub>min,max</sub>                | 0.846, 0.980                                                                                                                                       |
| $2\theta_{\text{max}}$ (°)                       | 27.50                                                                                                                                              |
| $hkl$ range                                      | $-16 \leq h \leq 15, -22 \leq k \leq 22, -31 \leq l \leq 31$                                                                                       |
| $N$                                              | 116633                                                                                                                                             |
| $N_{\text{ind}}$                                 | 24176 ( $R_{\text{merge}} 0.0694$ )                                                                                                                |
| $N_{\text{obs}}(I > 2\sigma(I))$                 | 19570                                                                                                                                              |
| GoF(all data)                                    | 1.053                                                                                                                                              |
| $R_1, wR_2 [I > 2\sigma(I)]$                     | 0.0389, 0.1019                                                                                                                                     |
| $R_1, wR_2$ (all data)                           | 0.0529, 0.1085                                                                                                                                     |

**Table 3:** Crystallographic data for the solid state structures of  $[\text{Rh}_2(\text{CO})_4(\text{L}_m)]_2[\text{BAr}^{\text{F}}_4]_2$  (**10**) CCDC-798124.

|                                         | $[\text{Rh}_2(\text{CO})_2(\text{L}_m)]_2[\text{BAr}^{\text{F}}_4]_2 \cdot 0.125 \text{ CH}_2\text{Cl}_2$<br>( <b>10</b> ) $\cdot 0.125 \text{ CH}_2\text{Cl}_2$ |
|-----------------------------------------|------------------------------------------------------------------------------------------------------------------------------------------------------------------|
| Empirical formula                       | $\text{C}_{88.125}\text{H}_{42.25}\text{B}_2\text{Cl}_{0.25}\text{F}_{48}\text{N}_8\text{O}_4\text{Rh}_2$                                                        |
| $M$ (g mol <sup>-1</sup> )              | 2425.35                                                                                                                                                          |
| Crystal system                          | monoclinic                                                                                                                                                       |
| Space group                             | $P2_1$                                                                                                                                                           |
| $a$ (Å)                                 | 16.1319(3)                                                                                                                                                       |
| $b$ (Å)                                 | 19.1238(4)                                                                                                                                                       |
| $c$ (Å)                                 | 31.7567(6)                                                                                                                                                       |
| $\beta$ (°)                             | 103.648(1)                                                                                                                                                       |
| $V$ (Å <sup>3</sup> )                   | 9520.4(3)                                                                                                                                                        |
| $D_c$ (g.cm <sup>-3</sup> )             | 1.692                                                                                                                                                            |
| $Z$                                     | 4                                                                                                                                                                |
| $T$ (K)                                 | 150(2)                                                                                                                                                           |
| $\lambda$ Mo-K $\alpha$ (Å)             | 0.71073                                                                                                                                                          |
| $\mu$ Mo-K $\alpha$ (mm <sup>-1</sup> ) | 0.503                                                                                                                                                            |
| Crystal size (mm)                       | 0.45 x 0.35 x 0.20                                                                                                                                               |
| $T$ (Gaussian) <sub>min,max</sub>       | 0.8476, 0.9062                                                                                                                                                   |
| $2\theta_{\text{max}}$ (°)              | 26.00                                                                                                                                                            |
| $hkl$ range                             | $-19 \leq 19, -22 \leq 23, -39 \leq 39$                                                                                                                          |
| $N$                                     | 85461                                                                                                                                                            |
| $N_{\text{ind}}$                        | 33929 ( $R_{\text{merge}}$ 0.0284)                                                                                                                               |
| $N_{\text{obs}}(I > 2\sigma(I))$        | 28061                                                                                                                                                            |
| GoF(all data)                           | 1.045                                                                                                                                                            |
| $R_1, wR_2 [I > 2\sigma(I)]$            | 0.0450, 0.1069                                                                                                                                                   |
| $R_1, wR_2$ (all data)                  | 0.0613, 0.1141                                                                                                                                                   |

**Table 4:** Crystallographic data for the solid state structures of  $[\text{Rh}_2(\text{COD})_2(\text{L}_p)][\text{BAr}^{\text{F}}_4]_2$  (**2**) and  $[\text{Ir}_2(\text{COD})_2(\text{L}_p)][\text{BAr}^{\text{F}}_4]_2$  (**3**). (CCDC-798123 and -798122, respectively)

|                                         | $[\text{Rh}_2(\text{COD})_2(\text{L}_p)][\text{BAr}^{\text{F}}_4]_2$<br>$\cdot 0.3 \text{ CH}_2\text{Cl}_2$<br><b>(2) · 0.3 CH<sub>2</sub>Cl<sub>2</sub></b> | $[\text{Ir}_2(\text{COD})_2(\text{L}_p)][\text{BAr}^{\text{F}}_4]_2$<br>$\cdot 0.2 \text{ CH}_2\text{Cl}_2$<br><b>(3) · 0.2 CH<sub>2</sub>Cl<sub>2</sub></b> |
|-----------------------------------------|--------------------------------------------------------------------------------------------------------------------------------------------------------------|--------------------------------------------------------------------------------------------------------------------------------------------------------------|
| Empirical formula                       | $\text{C}_{100.3}\text{H}_{66.6}\text{B}_2\text{Cl}_{0.6}\text{F}_{48}\text{N}_8\text{Rh}_2$                                                                 | $\text{C}_{100.2}\text{H}_{66.4}\text{B}_2\text{Cl}_{0.4}\text{F}_{48}\text{Ir}_2\text{N}_8$                                                                 |
| $M$ (g mol <sup>-1</sup> )              | 2544.53                                                                                                                                                      | 2714.65                                                                                                                                                      |
| Crystal system                          | monoclinic                                                                                                                                                   | monoclinic                                                                                                                                                   |
| Space group                             | $P2_1/n$                                                                                                                                                     | $P2_1/n$                                                                                                                                                     |
| $a$ (Å)                                 | 13.1485(3)                                                                                                                                                   | 13.1567(3)                                                                                                                                                   |
| $b$ (Å)                                 | 26.1740(5)                                                                                                                                                   | 26.1697(5)                                                                                                                                                   |
| $c$ (Å)                                 | 15.2911(3)                                                                                                                                                   | 15.2518(3)                                                                                                                                                   |
| $\beta$ (°)                             | 103.588(1)                                                                                                                                                   | 103.404(1)                                                                                                                                                   |
| $V$ (Å <sup>3</sup> )                   | 5115.12(19)                                                                                                                                                  | 5108.25(18)                                                                                                                                                  |
| $D_c$ (g.cm <sup>-3</sup> )             | 1.652                                                                                                                                                        | 1.765                                                                                                                                                        |
| $Z$                                     | 2                                                                                                                                                            | 2                                                                                                                                                            |
| $T$ (K)                                 | 150(2)                                                                                                                                                       | 150(2)                                                                                                                                                       |
| $\lambda$ Mo-K $\alpha$ (Å)             | 0.71073                                                                                                                                                      | 0.71073                                                                                                                                                      |
| $\mu$ Mo-K $\alpha$ (mm <sup>-1</sup> ) | 0.478                                                                                                                                                        | 2.753                                                                                                                                                        |
| Crystal size (mm)                       | 0.50 x 0.30 x 0.20                                                                                                                                           | 0.58 x 0.40 x 0.24                                                                                                                                           |
| $T$ (Gaussian) <sub>min,max</sub>       | 0.9105, 0.8658                                                                                                                                               | 0.5151, 0.3710                                                                                                                                               |
| $2\theta_{\text{max}}$ (°)              | 30.00                                                                                                                                                        | 32.00                                                                                                                                                        |
| $hkl$ range                             | $-18 \leq 15, -36 \leq 30, -19 \leq 21$                                                                                                                      | $-19 \leq 19, -23 \leq 39, -19 \leq 22$                                                                                                                      |
| $N$                                     | 54454                                                                                                                                                        | 61231                                                                                                                                                        |
| $N_{\text{ind}}$                        | 14416 ( $R_{\text{merge}}$ 0.0204)                                                                                                                           | 17747 ( $R_{\text{merge}}$ 0.0298)                                                                                                                           |
| $N_{\text{obs}}(I > 2\sigma(I))$        | 11927                                                                                                                                                        | 14160                                                                                                                                                        |
| GoF(all data)                           | 1.061                                                                                                                                                        | 1.027                                                                                                                                                        |
| $R_1, wR_2 [I > 2\sigma(I)]$            | 0.0390, 0.0983                                                                                                                                               | 0.0329, 0.0716                                                                                                                                               |
| $R_1, wR_2$ (all data)                  | 0.0521, 0.1034                                                                                                                                               | 0.0505, 0.0757                                                                                                                                               |

**Table 5:** Crystallographic data for the solid state structure of  $[\text{Ir}_2(\text{CO})_4(\text{L}_p)][\text{BAr}^{\text{F}}_4]_2$  (**9**).

CCDC-798121

|                                          | <b><math>[\text{Ir}_2(\text{CO})_2(\text{L}_p)][\text{BAr}^{\text{F}}_4]_2 \cdot 3\text{THF}</math><br/>(<b>9</b>) · 3THF</b> |
|------------------------------------------|-------------------------------------------------------------------------------------------------------------------------------|
| Empirical formula                        | $\text{C}_{112}\text{H}_{90}\text{B}_2\text{F}_{48}\text{Ir}_2\text{N}_8\text{O}_{10}$                                        |
| $M$ ( $\text{g mol}^{-1}$ )              | 3025.98                                                                                                                       |
| Crystal system                           | triclinic                                                                                                                     |
| Space group                              | $P-1$                                                                                                                         |
| $a$ (Å)                                  | 12.6310(3)                                                                                                                    |
| $b$ (Å)                                  | 13.8922(3)                                                                                                                    |
| $c$ (Å)                                  | 18.4681(4)                                                                                                                    |
| $\alpha$ (°)                             | 95.388(1)                                                                                                                     |
| $\beta$ (°)                              | 100.973(1)                                                                                                                    |
| $\gamma$ (°)                             | 108.210(1)                                                                                                                    |
| $V$ (Å <sup>3</sup> )                    | 2980.90(12)                                                                                                                   |
| $D_c$ ( $\text{g.cm}^{-3}$ )             | 1.686                                                                                                                         |
| $Z$                                      | 1                                                                                                                             |
| $T$ (K)                                  | 150(2)                                                                                                                        |
| $\lambda$ Mo-K $\alpha$ (Å)              | 0.71073                                                                                                                       |
| $\mu$ Mo-K $\alpha$ ( $\text{mm}^{-1}$ ) | 2.365                                                                                                                         |
| Crystal size (mm)                        | 0.60 x 0.38 x 0.35                                                                                                            |
| $T$ (Gaussian) <sub>min,max</sub>        | 0.4374, 0.3346                                                                                                                |
| $2\theta_{\text{max}}$ (°)               | 28.00                                                                                                                         |
| $hkl$ range                              | $-16 \leq 16, -18 \leq 18, -24 \leq 24$                                                                                       |
| $N$                                      | 48457                                                                                                                         |
| $N_{\text{ind}}$                         | 14341 ( $R_{\text{merge}}$ 0.0239)                                                                                            |
| $N_{\text{obs}}(I > 2\sigma(I))$         | 11743                                                                                                                         |
| GoF(all data)                            | 1.058                                                                                                                         |
| $R_1, wR_2$ [ $I > 2\sigma(I)$ ]         | 0.0327, 0.0797                                                                                                                |
| $R_1, wR_2$ (all data)                   | 0.0485, 0.0859                                                                                                                |

**Table 6:** Crystallographic data for the solid state structure of  $[\text{Rh}_2(\text{COD})_2(\text{L}_{\text{Ant}})][\text{BAR}^{\text{F}}_4]_2$  (**6**).

CCDC-798126

|                                           | $[\text{Rh}_2(\text{COD})_2(\text{L}_{\text{Ant}})][\text{BAR}^{\text{F}}_4]_2 \cdot 2.5 \text{ CH}_2\text{Cl}_2$<br>( <b>6</b> ) $\cdot 2.5 \text{ CH}_2\text{Cl}_2$ |
|-------------------------------------------|-----------------------------------------------------------------------------------------------------------------------------------------------------------------------|
| Empirical formula                         | $\text{C}_{221}\text{H}_{150}\text{B}_4\text{Cl}_{10}\text{F}_{96}\text{N}_{16}\text{Rh}_4$                                                                           |
| $M$ ( $\text{g mol}^{-1}$ )               | 5662.95                                                                                                                                                               |
| Crystal system                            | monoclinic                                                                                                                                                            |
| Space group                               | $Cc$                                                                                                                                                                  |
| $a$ (Å)                                   | 38.2718(4)                                                                                                                                                            |
| $b$ (Å)                                   | 14.0298(1)                                                                                                                                                            |
| $c$ (Å)                                   | 25.8175(3)                                                                                                                                                            |
| $\beta$ (°)                               | 121.802(2)                                                                                                                                                            |
| $V$ (Å <sup>3</sup> )                     | 11781.5(3)                                                                                                                                                            |
| $D_c$ ( $\text{g cm}^{-3}$ )              | 1.596                                                                                                                                                                 |
| $Z$                                       | 2                                                                                                                                                                     |
| $T$ (K)                                   | 200(2)                                                                                                                                                                |
| $\lambda$ Mo- $K_\alpha$ (Å)              | 0.71073                                                                                                                                                               |
| $\mu$ Mo- $K_\alpha$ ( $\text{mm}^{-1}$ ) | 0.520                                                                                                                                                                 |
| Crystal size (mm)                         | 0.44 x 0.31 x 0.23                                                                                                                                                    |
| $T$ (Gaussian) <sub>min,max</sub>         | 0.920, 0.865                                                                                                                                                          |
| $2\theta_{\text{max}}$ (°)                | 27.49                                                                                                                                                                 |
| $hkl$ range                               | $-49 \leq 49, -18 \leq 18, -32 \leq 33$                                                                                                                               |
| $N$                                       | 126307                                                                                                                                                                |
| $N_{\text{ind}}$                          | 26439 ( $R_{\text{merge}}$ 0.0359)                                                                                                                                    |
| $N_{\text{obs}}(I > 2\sigma(I))$          | 24447                                                                                                                                                                 |
| GoF(all data)                             | 1.046                                                                                                                                                                 |
| $R_1, wR_2 [I > 2\sigma(I)]$              | 0.0414, 0.1077                                                                                                                                                        |
| $R_1, wR_2$ (all data)                    | 0.0466, 0.1113                                                                                                                                                        |

**Table 7:** Crystallographic data for the solid state structure of  $[\text{Ir}(\text{COD})(\text{L}_m)]\text{BAr}^{\text{F}}_4$  (**15**).

CCDC-798125

|                                                  | <b><math>[\text{Ir}(\text{COD})(\text{L}_m)]\text{BAr}^{\text{F}}_4</math></b><br><b>(15)</b> |
|--------------------------------------------------|-----------------------------------------------------------------------------------------------|
| Empirical formula                                | $\text{C}_{60}\text{H}_{42}\text{BF}_{24}\text{IrN}_8$                                        |
| $M$ ( $\text{g mol}^{-1}$ )                      | 1534.03                                                                                       |
| Crystal system                                   | monoclinic                                                                                    |
| Space group                                      | $P2_1/c$                                                                                      |
| $a$ (Å)                                          | 13.2724(4)                                                                                    |
| $b$ (Å)                                          | 25.0291(7)                                                                                    |
| $c$ (Å)                                          | 19.2865(5)                                                                                    |
| $\beta$ ( $^\circ$ )                             | 108.476(1)                                                                                    |
| $V$ (Å <sup>3</sup> )                            | 6076.7(3)                                                                                     |
| $D_c$ ( $\text{g.cm}^{-3}$ )                     | 1.677                                                                                         |
| $Z$                                              | 4                                                                                             |
| $T$ (K)                                          | 150(2)                                                                                        |
| $\lambda$ Mo- $\text{K}_\alpha$ (Å)              | 0.71073                                                                                       |
| $\mu$ Mo- $\text{K}_\alpha$ ( $\text{mm}^{-1}$ ) | 2.318                                                                                         |
| Crystal size (mm)                                | 0.40 x 0.30 x 0.13                                                                            |
| $T$ (Gaussian) <sub>min,max</sub>                | 0.7375, 0.5494                                                                                |
| $\theta_{\text{max}}$ ( $^\circ$ )               | 27.00                                                                                         |
| $hkl$ range                                      | $-16 \leq h \leq 11, -30 \leq k \leq 30, -24 \leq l \leq 24$                                  |
| $N$                                              | 53760                                                                                         |
| $N_{\text{ind}}$                                 | 12893 ( $R_{\text{merge}}$ 0.0314)                                                            |
| $N_{\text{obs}}(I > 2\sigma(I))$                 | 10498                                                                                         |
| GoF(all data)                                    | 1.107                                                                                         |
| $R_1, wR_2$ [ $I > 2\sigma(I)$ ]                 | 0.0477, 0.1228                                                                                |
| $R_1, wR_2$ (all data)                           | 0.0646, 0.1281                                                                                |

**Table 8:** Crystallographic data for the solid state structure of  $[\text{Ir}(\text{COD})(\text{L}_{\text{Ant}})]\text{BAr}^{\text{F}}_4$  (**22**).

CCDC-798120

|                                          | <b><math>[\text{Ir}(\text{COD})(\text{L}_{\text{Ant}})]\text{BAr}^{\text{F}}_4</math></b><br><b>(22)</b> |
|------------------------------------------|----------------------------------------------------------------------------------------------------------|
| Empirical formula                        | $\text{C}_{68}\text{H}_{46}\text{BF}_{24}\text{IrN}_8$                                                   |
| $M$ ( $\text{g mol}^{-1}$ )              | 1634.14                                                                                                  |
| Crystal system                           | triclinic                                                                                                |
| Space group                              | $P-1$                                                                                                    |
| $a$ (Å)                                  | 14.0601(4)                                                                                               |
| $b$ (Å)                                  | 14.2130(4)                                                                                               |
| $c$ (Å)                                  | 17.9485(5)                                                                                               |
| $\alpha$ (°)                             | 79.627(2)                                                                                                |
| $\beta$ (°)                              | 73.886(1)                                                                                                |
| $\gamma$ (°)                             | 70.046(1)                                                                                                |
| $V$ (Å <sup>3</sup> )                    | 3224.48(16)                                                                                              |
| $D_c$ ( $\text{g cm}^{-3}$ )             | 1.683                                                                                                    |
| $Z$                                      | 2                                                                                                        |
| $T$ (K)                                  | 150(2)                                                                                                   |
| $\lambda$ Mo-K $\alpha$ (Å)              | 0.71073                                                                                                  |
| $\mu$ Mo-K $\alpha$ ( $\text{mm}^{-1}$ ) | 2.190                                                                                                    |
| Crystal size (mm)                        | 0.55 x 0.40 x 0.28                                                                                       |
| $T$ (Gaussian) <sub>min,max</sub>        | 0.5444, 0.4435                                                                                           |
| $\theta_{\text{max}}$ (°)                | 32.00                                                                                                    |
| $hkl$ range                              | $-18 \leq 20, -21 \leq 20, -26 \leq 26$                                                                  |
| $N$                                      | 75016                                                                                                    |
| $N_{\text{ind}}$                         | 22118 ( $R_{\text{merge}}$ 0.0283)                                                                       |
| $N_{\text{obs}}(I > 2\sigma(I))$         | 18745                                                                                                    |
| GoF(all data)                            | 1.091                                                                                                    |
| $R_1, wR_2$ [ $I > 2\sigma(I)$ ]         | 0.0288, 0.0630                                                                                           |
| $R_1, wR_2$ (all data)                   | 0.0433, 0.0666                                                                                           |
